# Supplementary material for: Hybrids of cobalt nanochains and polyvinylidene fluoride with enhanced microwave absorption performance
Source: Royal Society of Chemistry journal article supplement (doi:10.1039/c6ra10722b), 2016-01-01
Supplement: c6ra10722b1.pdf [file c6ra10722b1.pdf]

## Supporting Information

### Hybrids of cobalt nanochains and polyvinylidene fluoride with enhanced microwave absorption performance

Shu-Qing Lv,<sup>a</sup> Ya-Fei Pan,<sup>b</sup> Pei-Bo Yang,<sup>b</sup> Guang-Sheng Wang\*<sup>b</sup>

*a School of Civil Engineering, Northeast Dianli University, Jilin 132012, PR China*

*b Key Laboratory of Bio-Inspired Smart Interfacial Science and Technology of Ministry of Education, School of Chemistry and Environment, Beihang University, Beijing 100191, PR China.*

*Correspondence should be addressed to Guang-Sheng Wang, E-mail: wanggsh@buaa.edu.cn*

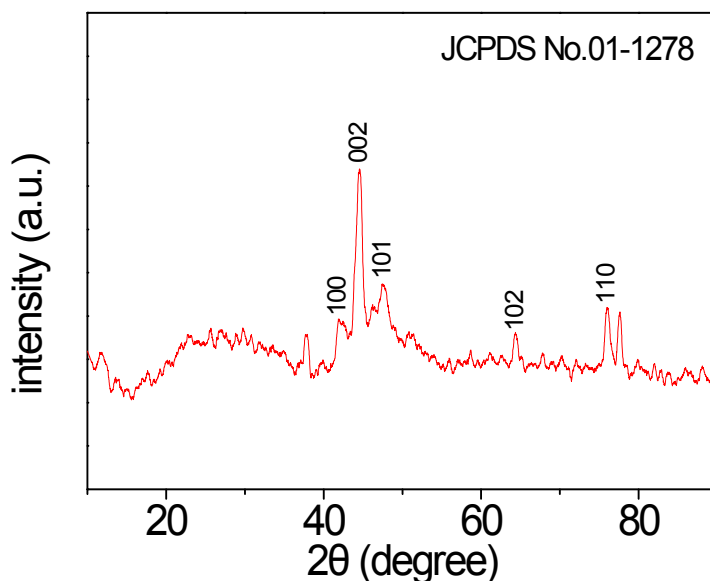

**Figure S1.** XRD pattern of Co nanochains, identified as the hexagonal cobalt.

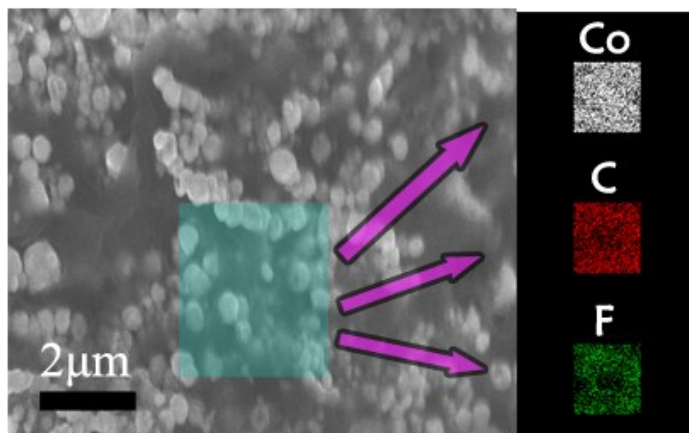

**Figure S2.** FESEM image of the fractured surface of the Co/PVDF composite film and corresponding elemental maps of Co, C, and F.

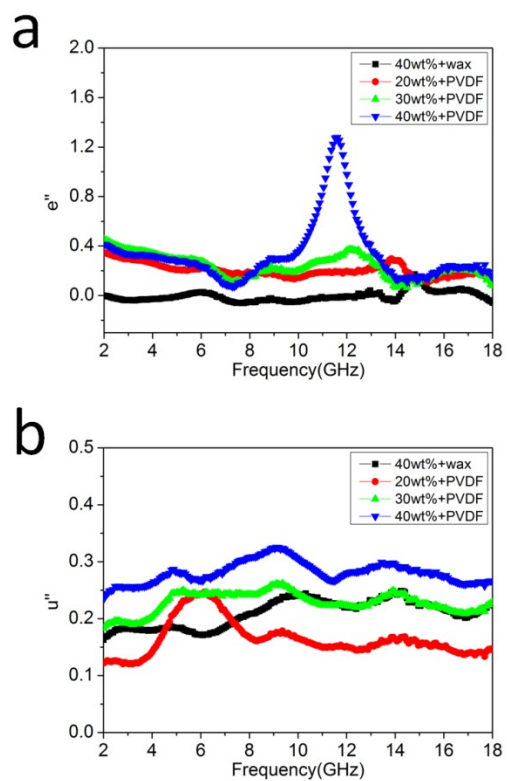

**Figure S3.** Frequency dependence on imaginary parts of the complex (a) permittivity and (b) permeability of samples.
